# Supplementary material
Source: Springer Nature journal article supplement (https://www.springermedizin.de/resource/supplementary/12957_2011_905_MOESM1_ESM.pdf/9565742)

SmallParts

#255 / 4.5cm MI 1.4 2010-07-13

L5-9EC / Gen TIs 0.0 09:58:52

[2D] G50 / 100dB

FA0 / P100

M

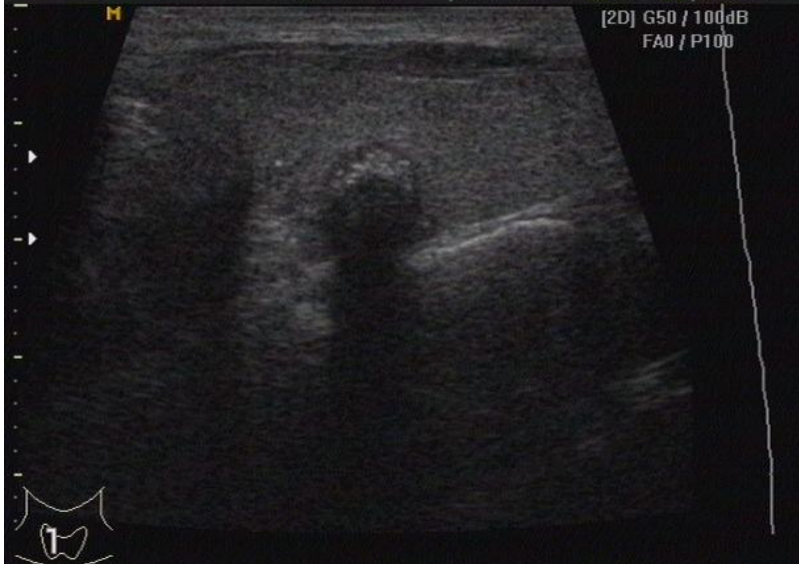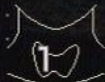

Supplement: MOESM1 [file 9565742]
